# Supplementary material for: Treatment outcome in early diffuse cutaneous systemic sclerosis: the European Scleroderma Observational Study (ESOS)
Source: PubMed Central journal article supplement — Ann Rheum Dis. 2017 Jun 9;76(7):1207–18. doi: 10.1136/annrheumdis-2016-210503 (PMC5530354; doi:10.1136/annrheumdis-2016-210503), 2017-06-09

Supplementary Figure 1 Patient adherence to initial protocol.

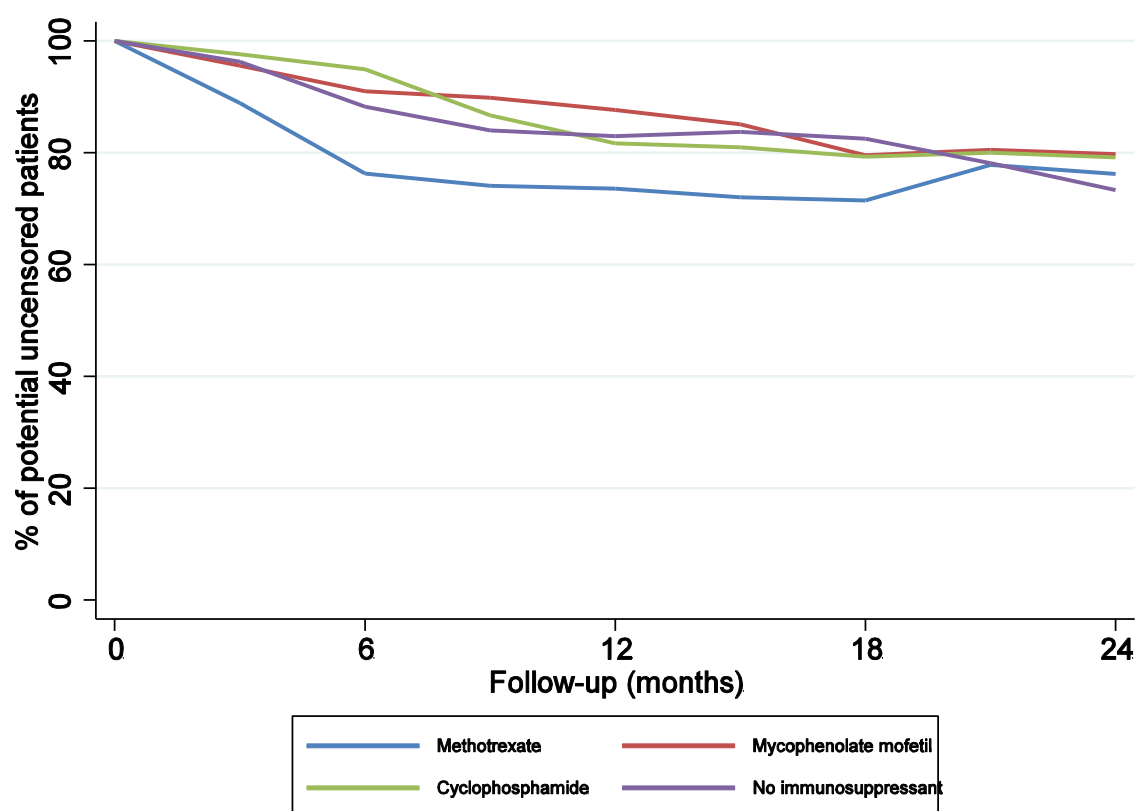

Supplementary Figure 2 Cases of organ involvement according to initial protocol.

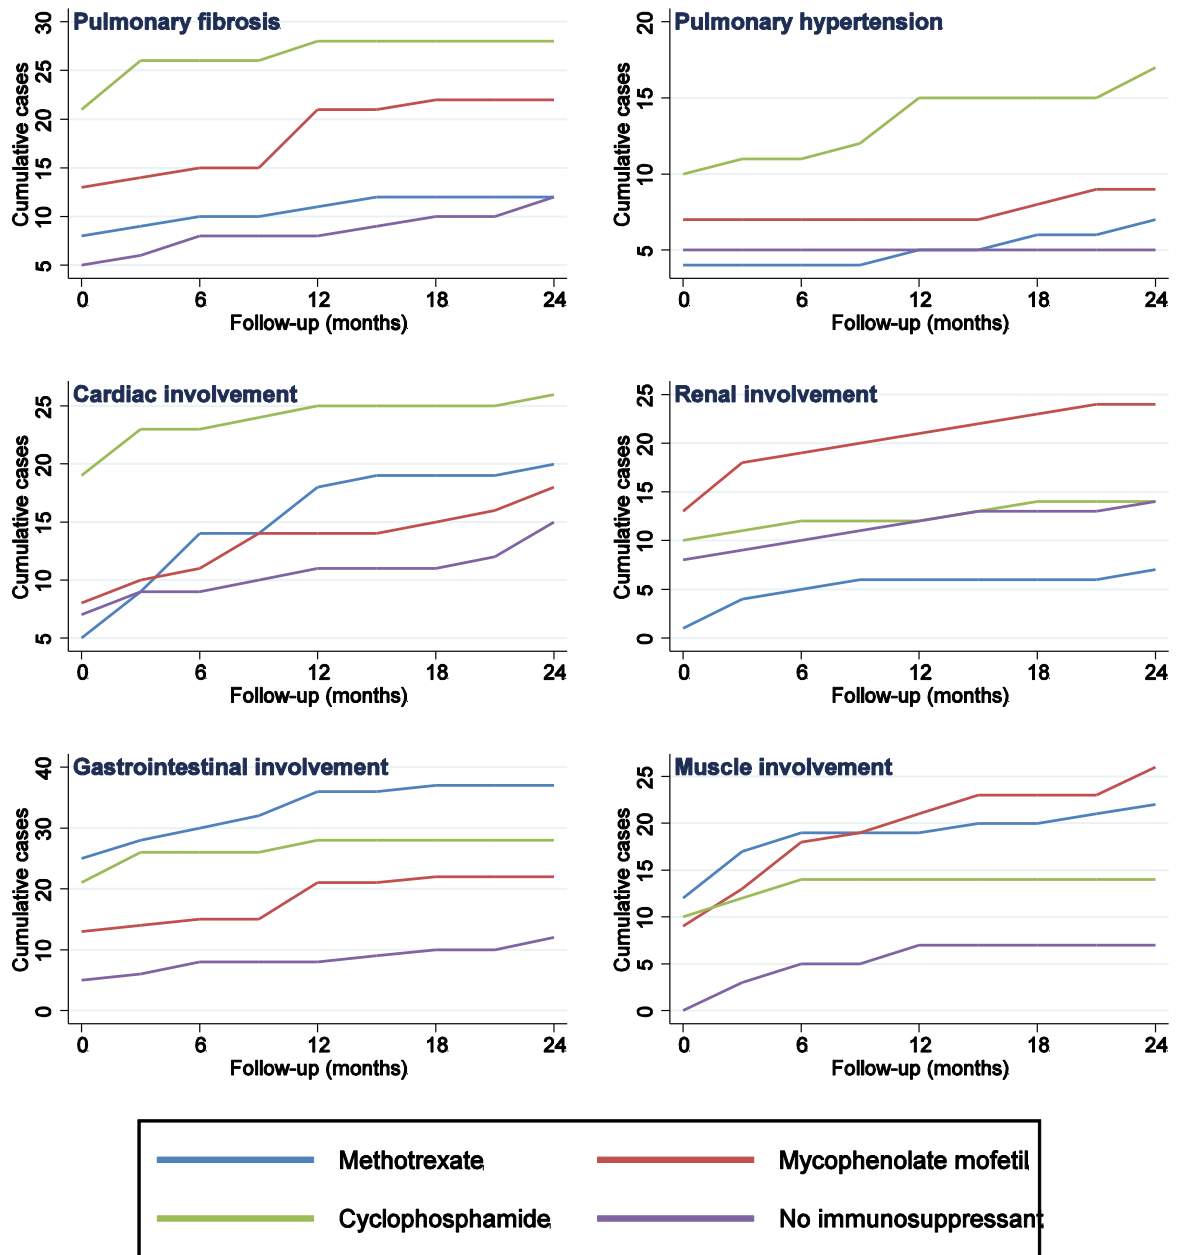

Supplementary Figure 3 Tolerability of treatments.

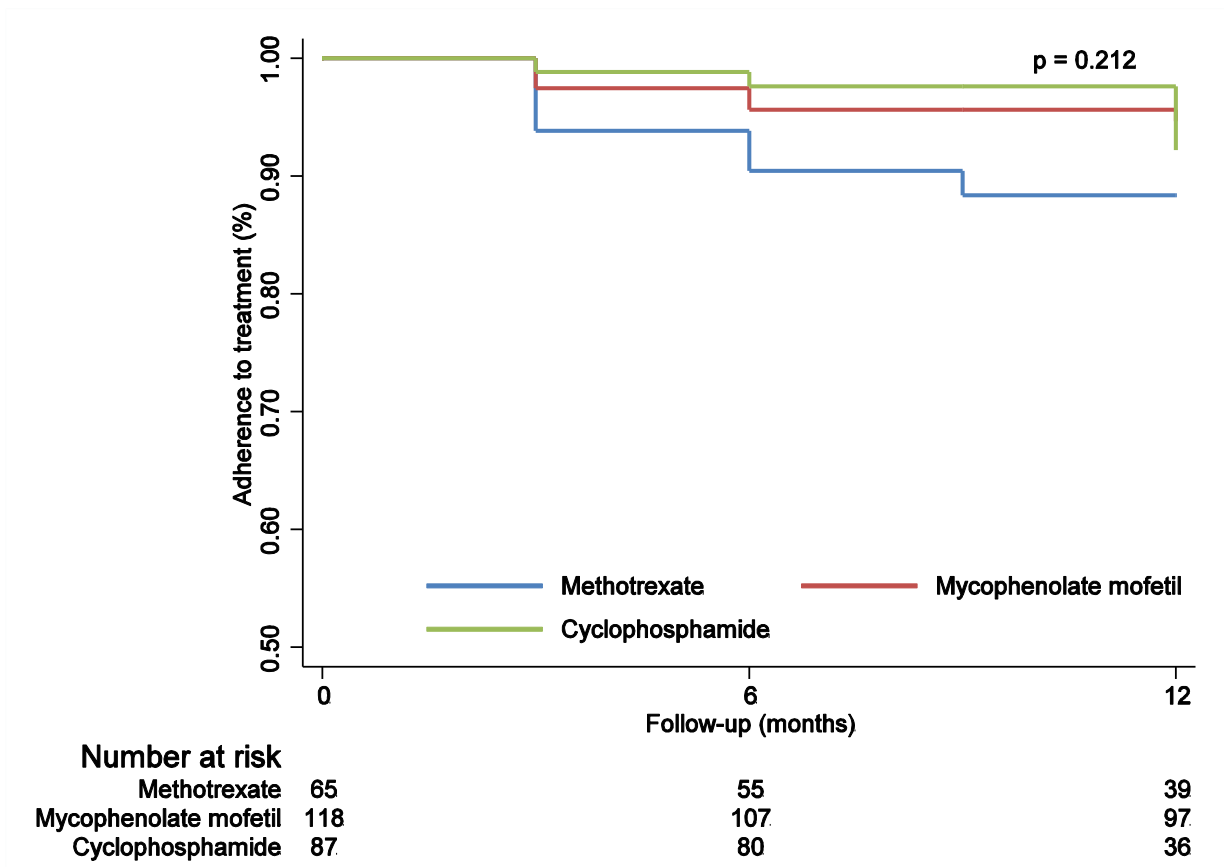

Supplement: annrheumdis-2016-210503supp002.pdf [file annrheumdis-2016-210503supp002.pdf]
